# Supplementary material for: An ancient conserved role for prion protein in learning and memory
Source: PubMed Central journal article supplement (PMC5829491; doi:10.1242/bio.025734), 2018-01-10
Supplement: biolopen-7-025734-s1.pdf [file biolopen-7-025734-s1.pdf]

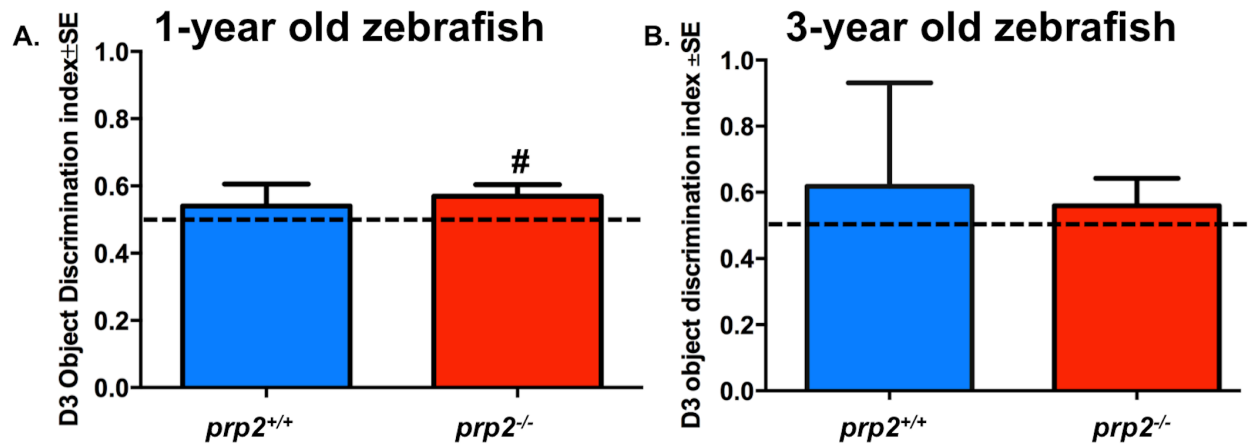

**Supplementary Figure S1.** After a 1-minute retention interval, 1-year old *prp2*<sup>-/-</sup> zebrafish displayed familiar object preference with the object preference test, but 3-year old *prp2*<sup>-/-</sup> zebrafish did not. **A.** The D3 discrimination index revealed that 1-year old *prp2*<sup>-/-</sup> zebrafish displayed familiar object preference after a 1-minute retention interval, but 1-year old *prp2*<sup>+/+</sup> zebrafish did not. # indicates significant difference from 0.5 (dotted line) with  $p < 0.05$  using the one-sample t-test;  $n = 13$  *prp2*<sup>+/+</sup> fish,  $n = 28$  *prp2*<sup>-/-</sup> fish). **B.** At 3 years of age neither genotype (*prp2*<sup>+/+</sup> or *prp2*<sup>-/-</sup>) displayed object preference after a 1-minute retention interval as revealed by the D3 discrimination index ( $n = 16$  fish/genotype).

**A. Novel Object Approach (NOA) Test**

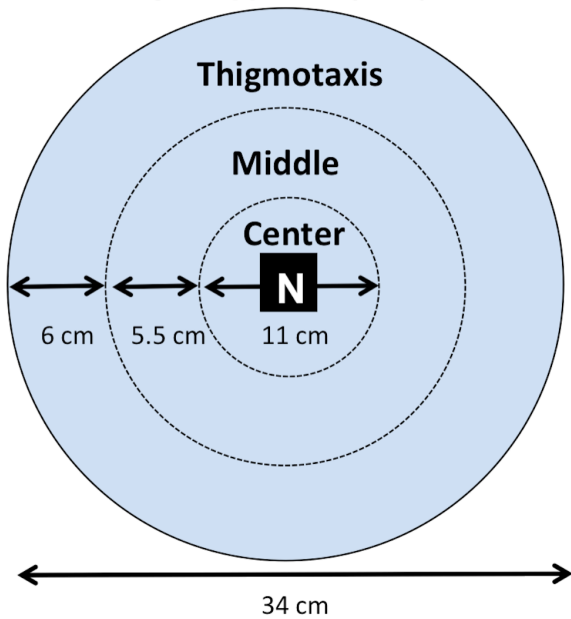

**B. Novel Tank Diving Test**

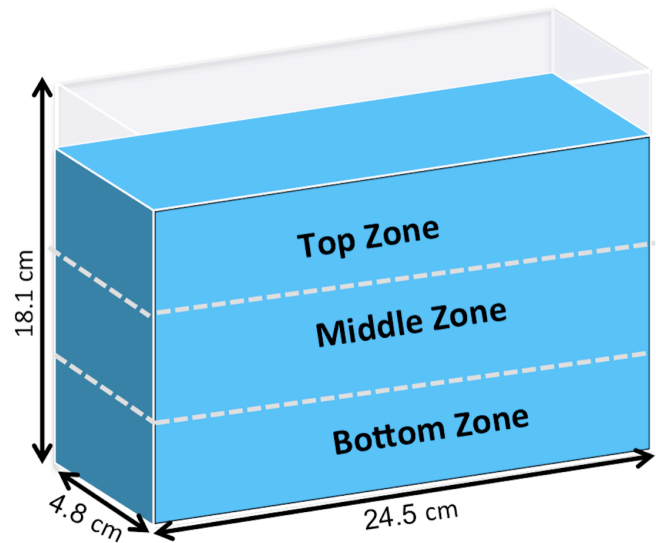

**Supplementary Figure S2. A.** Schematic of the Novel Object Approach (NOA) setup. Fish were netted and placed into a circular arena, where they acclimated for 15 minutes. After this time, a novel object (N) was placed into the center of the arena and the activity of the fish was recorded for 5 minutes. The arena was virtually divided into center, middle, and thigmotaxis zones for data analysis. **B.** Schematic of the tank diving test. Fish were netted and placed into the novel tank (narrower and deeper than the home tank) and activity of the fish was recorded for 5 minutes. The tank was virtually divided into bottom, middle and top zones for data analysis.
